# Supplementary material
Source: MDPI journal article supplement (https://www.mdpi.com/2311-7524/8/5/462)
Supplement: s1 [file s1 › Supplementary files.pdf]

## Motif 1

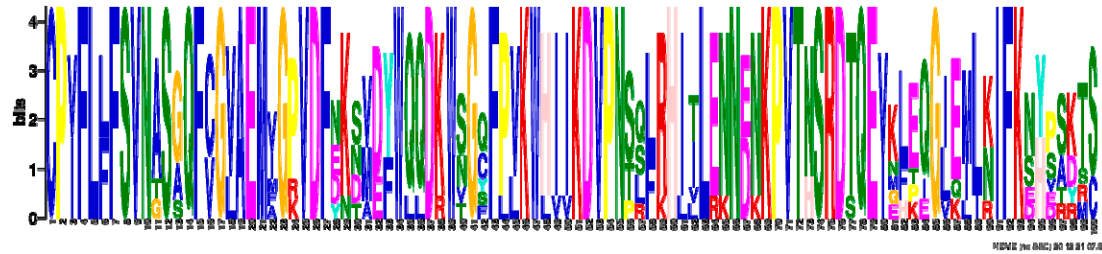

## Motif 2

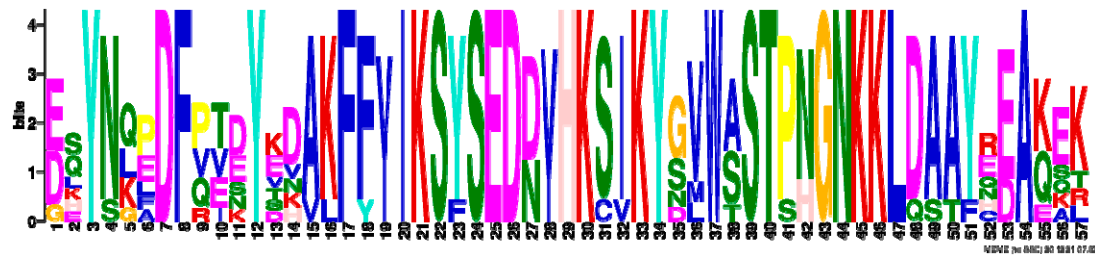

### Motif 3

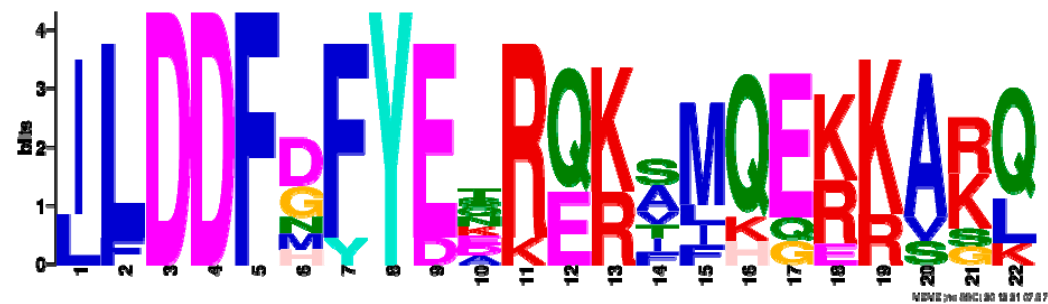

Motif 4

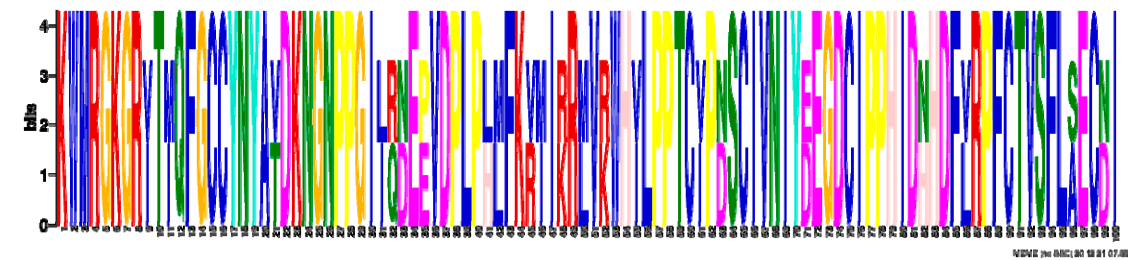

Motif 5

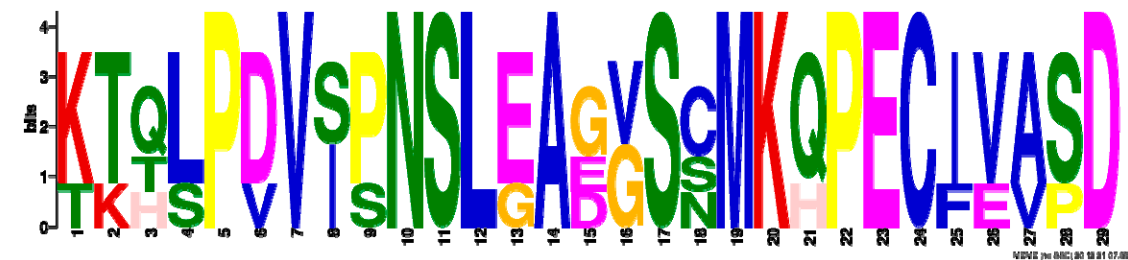

Motif 6

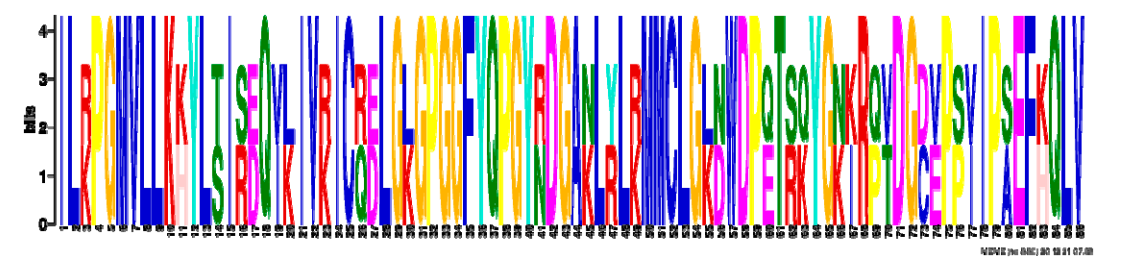

Motif 7

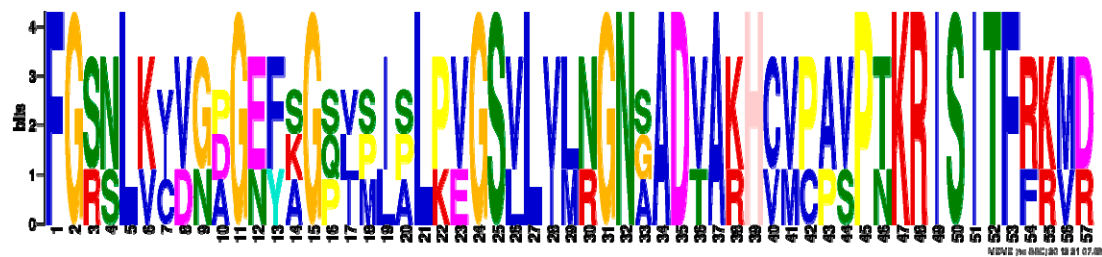

Motif 8

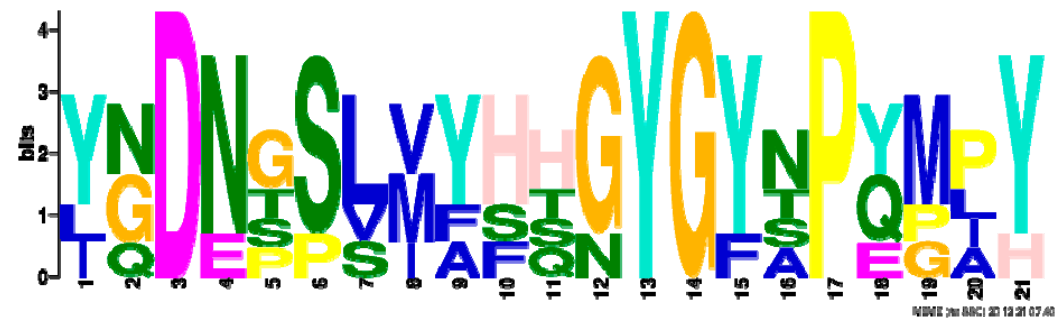

Motif 9

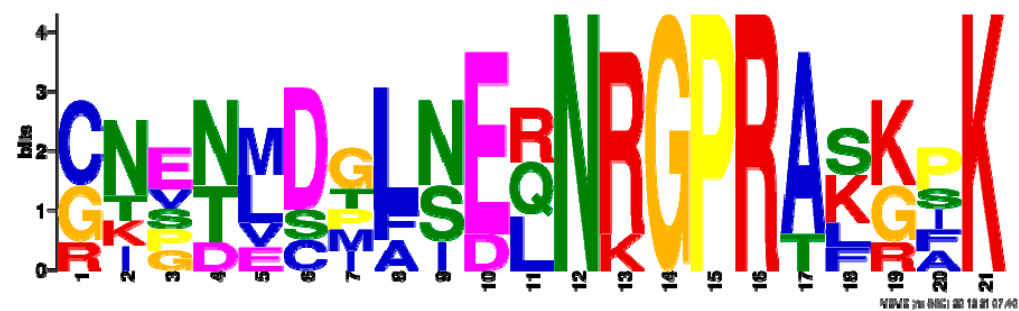

## Motif 10

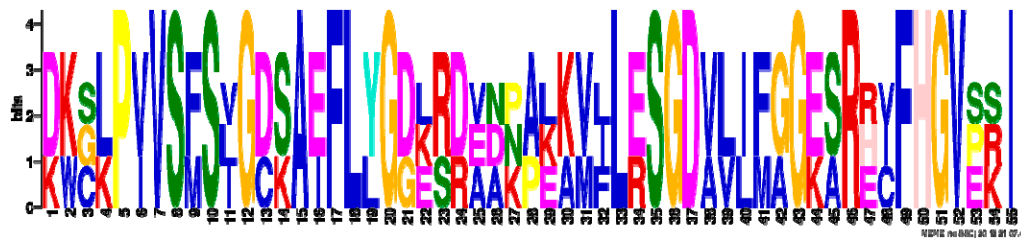

**Figure S1.** Sequence logos for the conserved motifs of m6A regulatory genes domain proteins from *Citrus grandis*. Conserved motifs and the sequence logos were generated using the MEME search tool. Numbers on the horizontal axis represent the sequence positions in the motifs and the vertical axis represents the information content measured in bits.

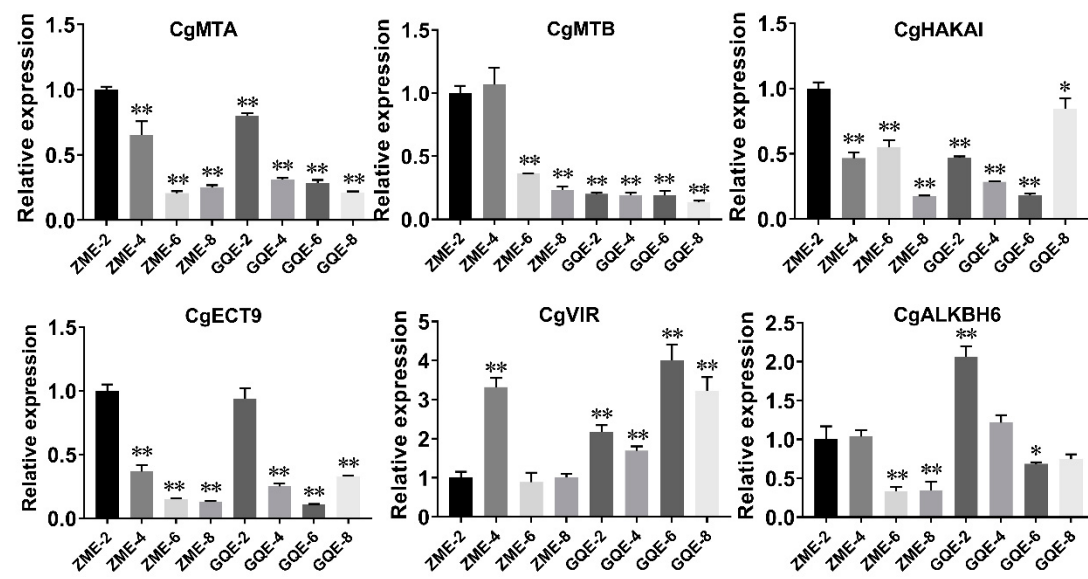

**Figure S2.** Relative expression of 6 m6A regulatory genes in the fruits of ZM and GQ during various growth points.
