# Supplementary material
Source: MDPI journal article supplement (https://www.mdpi.com/2311-7524/8/5/462)
Supplement: s1 [file s1 › Table S1.xlsx]

## Sheet: Sheet1
Gene ID	Gene name	Start	End	Motif	Reported plant	Description
Cg1g002100.1	CgALKBH1	744	750	ABRE	Arabidopsis thaliana	abscisic acid responsiveness
Cg2g000250.1	CgECT1	433	440	ABRE	Arabidopsis thaliana	abscisic acid responsiveness
Cg3g001240.1	CgECT3	1340	1345	ABRE	Arabidopsis thaliana	abscisic acid responsiveness
Cg3g004030.1	CgALKBH4	873	878	ABRE	Arabidopsis thaliana	abscisic acid responsiveness
Cg3g010130.1	CgALKBH5	206	211	ABRE	Arabidopsis thaliana	abscisic acid responsiveness
Cg3g022350.1	CgMTC	227	235	ABRE	Oryza sativa	abscisic acid responsiveness
Cg4g020150.1	CgECT4	1238	1243	ABRE	Arabidopsis thaliana	abscisic acid responsiveness
Cg5g000680.1	CgMTA	1417	1422	ABRE	Arabidopsis thaliana	abscisic acid responsiveness
Cg5g005360.1	CgFIP37	816	822	ABRE	Arabidopsis thaliana	abscisic acid responsiveness
Cg5g009390.1	CgECT5	590	595	ABRE	Arabidopsis thaliana	abscisic acid responsiveness
Cg5g012920.1	CgALKBH6	148	153	ABRE	Arabidopsis thaliana	abscisic acid responsiveness
Cg5g031130.1	CgECT6	1086	1091	ABRE	Arabidopsis thaliana	abscisic acid responsiveness
Cg5g036060.1	CgALKBH7	188	193	ABRE	Arabidopsis thaliana	abscisic acid responsiveness
Cg6g006090.1	CgHAKAI	1262	1267	ABRE	Arabidopsis thaliana	abscisic acid responsiveness
Cg6g010210.1	CgALKBH9	868	873	ABRE	Arabidopsis thaliana	abscisic acid responsiveness
Cg7g016980.1	CgALKBH10	94	99	ABRE	Arabidopsis thaliana	abscisic acid responsiveness
Cg8g024900.1	CgECT8	944	949	ABRE	Arabidopsis thaliana	abscisic acid responsiveness
Cg9g000560.1	CgECT9	78	83	ABRE	Arabidopsis thaliana	abscisic acid responsiveness
Cg1g012910.1	CgALKBH2	1084	1090	TGA-element	Brassica oleracea	auxin-responsive element
Cg2g000250.1	CgECT1	137	143	TGA-element	Brassica oleracea	auxin-responsive element
Cg3g004030.1	CgALKBH4	764	770	TGA-element	Brassica oleracea	auxin-responsive element
Cg4g020150.1	CgECT4	64	70	TGA-element	Brassica oleracea	auxin-responsive element
Cg5g005360.1	CgFIP37	385	391	TGA-element	Brassica oleracea	auxin-responsive element
Cg5g009390.1	CgECT5	825	831	TGA-element	Brassica oleracea	auxin-responsive element
Cg5g012920.1	CgALKBH6	956	962	TGA-element	Brassica oleracea	auxin-responsive element
Cg6g010210.1	CgALKBH9	1454	1460	TGA-element	Brassica oleracea	auxin-responsive element
Cg9g000560.1	CgECT9	1480	1486	TGA-element	Brassica oleracea	auxin-responsive element
Cg1g002100.1	CgALKBH1	232	241	TC-rich repeats	Nicotiana tabacum	defense and stress responsiveness
Cg5g000680.1	CgMTA	314	323	TC-rich repeats	Nicotiana tabacum	defense and stress responsiveness
Cg5g009390.1	CgECT5	106	115	TC-rich repeats	Nicotiana tabacum	defense and stress responsiveness
Cg5g031130.1	CgECT6	107	116	TC-rich repeats	Nicotiana tabacum	defense and stress responsiveness
Cg8g024900.1	CgECT8	1115	1124	TC-rich repeats	Nicotiana tabacum	defense and stress responsiveness
Cg9g000560.1	CgECT9	1251	1260	TC-rich repeats	Nicotiana tabacum	defense and stress responsiveness
Cg1g012910.1	CgALKBH2	1351	1358	GARE-motif	Brassica oleracea	gibberellin-responsive element
Cg2g039370.1	CgECT2	49	56	GARE-motif	Brassica oleracea	gibberellin-responsive element
Cg3g001240.1	CgECT3	244	251	GARE-motif	Brassica oleracea	gibberellin-responsive element
Cg5g009390.1	CgECT5	788	795	P-box	Oryza sativa	gibberellin-responsive element
Cg5g012920.1	CgALKBH6	121	128	P-box	Oryza sativa	gibberellin-responsive element
Cg5g031130.1	CgECT6	1047	1054	P-box	Oryza sativa	gibberellin-responsive element
Cg5g037150.1	CgALKBH8	27	34	GARE-motif	Brassica oleracea	gibberellin-responsive element
Cg6g010210.1	CgALKBH9	1443	1450	P-box	Oryza sativa	gibberellin-responsive element
Cg3g004030.1	CgALKBH4	327	334	TATC-box	Oryza sativa	gibberellin-responsiveness
Cg5g009390.1	CgECT5	561	568	TATC-box	Oryza sativa	gibberellin-responsiveness
Cg6g014480.1	CgVIR	387	394	TATC-box	Oryza sativa	gibberellin-responsiveness
Cg7g016980.1	CgALKBH10	766	773	TATC-box	Oryza sativa	gibberellin-responsiveness
Cg1g002100.1	CgALKBH1	744	750	G-box	Arabidopsis thaliana	light responsiveness
Cg1g012910.1	CgALKBH2	263	269	G-box	Zea mays	light responsiveness
Cg2g000250.1	CgECT1	1460	1466	G-Box	Pisum sativum	light responsiveness
Cg3g001240.1	CgECT3	1340	1346	G-Box	Pisum sativum	light responsiveness
Cg3g004030.1	CgALKBH4	870	878	G-box	Brassica oleracea	light responsiveness
Cg3g010130.1	CgALKBH5	205	211	G-box	Arabidopsis thaliana	light responsiveness
Cg3g022350.1	CgMTC	229	235	G-box	Arabidopsis thaliana	light responsiveness
Cg4g020150.1	CgECT4	1237	1243	G-Box	Pisum sativum	light responsiveness
Cg5g000680.1	CgMTA	1417	1423	G-box	Arabidopsis thaliana	light responsiveness
Cg5g005360.1	CgFIP37	816	822	G-Box	Pisum sativum	light responsiveness
Cg5g009390.1	CgECT5	587	597	G-box	Nicotiana plumbaginifolia	light responsiveness
Cg5g012920.1	CgALKBH6	147	153	G-box	Arabidopsis thaliana	light responsiveness
Cg5g031130.1	CgECT6	1086	1092	G-box	Arabidopsis thaliana	light responsiveness
Cg5g036060.1	CgALKBH7	391	397	G-Box	Pisum sativum	light responsiveness
Cg6g010210.1	CgALKBH9	868	874	G-Box	Pisum sativum	light responsiveness
Cg6g014480.1	CgVIR	849	858	G-box	Brassica oleracea	light responsiveness
Cg7g016980.1	CgALKBH10	944	950	G-Box	Pisum sativum	light responsiveness
Cg8g024900.1	CgECT8	1228	1234	G-box	Arabidopsis thaliana	light responsiveness
Cg9g000560.1	CgECT9	77	83	G-box	Arabidopsis thaliana	light responsiveness
Cg3g010130.1	CgALKBH5	151	157	LTR	Hordeum vulgare	low-temperature responsiveness
Cg4g020150.1	CgECT4	1165	1171	LTR	Hordeum vulgare	low-temperature responsiveness
Cg5g005360.1	CgFIP37	750	756	LTR	Hordeum vulgare	low-temperature responsiveness
Cg6g010210.1	CgALKBH9	1128	1134	LTR	Hordeum vulgare	low-temperature responsiveness
Cg6g014480.1	CgVIR	1489	1495	LTR	Hordeum vulgare	low-temperature responsiveness
Cg1g002100.1	CgALKBH1	1183	1188	CGTCA-motif	Hordeum vulgare	MeJA-responsiveness
Cg1g012910.1	CgALKBH2	334	339	CGTCA-motif	Hordeum vulgare	MeJA-responsiveness
Cg2g039370.1	CgECT2	956	961	CGTCA-motif	Hordeum vulgare	MeJA-responsiveness
Cg2g046540.1	CgALKBH3	466	471	CGTCA-motif	Hordeum vulgare	MeJA-responsiveness
Cg3g001240.1	CgECT3	185	190	TGACG-motif	Hordeum vulgare	MeJA-responsiveness
Cg3g022350.1	CgMTC	1467	1472	CGTCA-motif	Hordeum vulgare	MeJA-responsiveness
Cg5g005360.1	CgFIP37	1424	1429	TGACG-motif	Hordeum vulgare	MeJA-responsiveness
Cg5g009390.1	CgECT5	588	593	CGTCA-motif	Hordeum vulgare	MeJA-responsiveness
Cg5g009390.1	CgECT5	588	593	TGACG-motif	Hordeum vulgare	MeJA-responsiveness
Cg5g031130.1	CgECT6	1159	1164	TGACG-motif	Hordeum vulgare	MeJA-responsiveness
Cg5g036060.1	CgALKBH7	760	765	TGACG-motif	Hordeum vulgare	MeJA-responsiveness
Cg5g037150.1	CgALKBH8	1468	1473	CGTCA-motif	Hordeum vulgare	MeJA-responsiveness
Cg7g016930.1	CgECT7	904	909	CGTCA-motif	Hordeum vulgare	MeJA-responsiveness
Cg7g016930.1	CgECT7	904	909	TGACG-motif	Hordeum vulgare	MeJA-responsiveness
Cg9g000560.1	CgECT9	131	136	TGACG-motif	Hordeum vulgare	MeJA-responsiveness
Cg1g002100.1	CgALKBH1	157	163	MBS	Arabidopsis thaliana	drought-inducibility
Cg3g001240.1	CgECT3	498	504	MBS	Arabidopsis thaliana	drought-inducibility
Cg3g004030.1	CgALKBH4	1365	1371	MBS	Arabidopsis thaliana	drought-inducibility
Cg3g010130.1	CgALKBH5	1320	1326	MBS	Arabidopsis thaliana	drought-inducibility
Cg3g022350.1	CgMTC	194	200	MBS	Arabidopsis thaliana	drought-inducibility
Cg5g009390.1	CgECT5	1365	1371	MBS	Arabidopsis thaliana	drought-inducibility
Cg5g012920.1	CgALKBH6	771	777	MBS	Arabidopsis thaliana	drought-inducibility
Cg5g037150.1	CgALKBH8	430	436	MBS	Arabidopsis thaliana	drought-inducibility
Cg6g006090.1	CgHAKAI	199	205	MBS	Arabidopsis thaliana	drought-inducibility
Cg6g010210.1	CgALKBH9	974	980	MBS	Arabidopsis thaliana	drought-inducibility
Cg7g016930.1	CgECT7	490	496	MBS	Arabidopsis thaliana	drought-inducibility
Cg8g024900.1	CgECT8	636	642	MBS	Arabidopsis thaliana	drought-inducibility
Cg9g000560.1	CgECT9	85	91	MBS	Arabidopsis thaliana	drought-inducibility
Cg9g027190.1	CgMTB	278	284	MBS	Arabidopsis thaliana	drought-inducibility
Cg2g039370.1	CgECT2	747	756	TCA-element	Nicotiana tabacum	salicylic acid responsiveness
Cg4g020150.1	CgECT4	9	18	TCA-element	Nicotiana tabacum	salicylic acid responsiveness
Cg6g010210.1	CgALKBH9	24	33	TCA-element	Nicotiana tabacum	salicylic acid responsiveness
Cg8g024900.1	CgECT8	118	127	TCA-element	Nicotiana tabacum	salicylic acid responsiveness
Cg9g000560.1	CgECT9	28	37	TCA-element	Nicotiana tabacum	salicylic acid responsiveness
