# Supplementary material
Source: MDPI journal article supplement (https://www.mdpi.com/2311-7524/8/5/462)
Supplement: s1 [file s1 › Table S2.xlsx]

## Sheet: Sheet1
	ZM-2-1	ZM-2-2	ZM-2-3	ZM-4-1	ZM-4-2	ZM-4-3	ZM-6-1	ZM-6-2	ZM-6-3	ZM-8-1	ZM-8-2	ZM-8-3	GQ-2-1	GQ-2-2	GQ-2-3	GQ-4-1	GQ-4-2	GQ-4-3	GQ-6-1	GQ-6-2	GQ-6-3	GQ-8-1	GQ-8-2	GQ-8-3
CgALKBH1	15.33	13.41	12.35	12.35	21.9	24.92	19.72	20.09	24.73	21.73	24.27	21.74	21.76	13.2	15.05	16.47	22.22	23.55	24.18	22.01	20.65	19.77	22.04	21.84
CgALKBH2	11.25	9.69	12.06	12.06	15.99	17.03	13.38	15.08	14.65	13.95	20.88	22.72	19.85	7.69	9.15	10.04	12.5	12.52	9.86	10.58	11.49	12.93	11.97	15.98
CgECT1	182.43	178.36	161.71	161.71	157.25	166.63	129.26	204.21	247.66	235.89	337.46	373.33	402.54	174.69	197.21	191	130.91	139.52	134.1	241.38	254.27	235.85	335.39	413
CgECT2	7.99	7.79	9.05	9.05	9.9	10.11	7.63	9.42	7.8	7.81	10.26	9.74	10.67	6.26	5.87	6.17	13.1	11.21	11.24	7.27	7.1	7.57	8.79	9.82
CgALKBH3	10.1	11.4	10.45	10.45	10.07	9.42	8.27	13.5	10.76	10.51	11.56	15.69	10.97	10.03	10.54	11.06	8.84	11.62	11.8	9.8	8.76	9.26	8.34	8.69
CgECT3	132.42	131.67	103.3	103.3	122.66	134.66	102.25	223.1	160.46	162.28	182.43	159.8	154.68	203.49	208.66	150.27	100.24	107.46	89.53	197.42	153.8	146.35	163.92	159.28
CgALKBH4	33.52	29.52	15.67	15.67	3.67	4.17	2.21	14.54	7.46	6.19	4.57	3.02	2.86	27.24	14.01	2.43	0.84	0.43	1.07	1.56	2.27	2.39	3.78	3.92
CgALKBH5	4.24	3.55	5.22	5.22	7.2	7.36	6.53	8.15	6.11	6.13	9.55	11.71	8.97	4.87	4.75	6.48	10.24	12.43	16.34	7.98	8.58	8.34	9.58	10.22
CgMTC	7.83	8.97	9.92	9.92	8.94	10.21	6.43	10.21	12	10.96	10.04	10.47	9.95	6.58	4.57	5.08	5.8	6.57	6.29	4.81	5.43	5.56	6.41	5.71
CgECT4	8.96	7.6	8.17	8.17	15.13	17	13.23	12.43	9.28	8.44	9.12	8.86	9.38	8.97	8.82	8.73	12.5	14.44	14.57	9.31	8.62	7.35	9.28	9.15
CgMTA	42.77	41.59	49.78	49.78	47.38	52.63	46.54	46.69	45.76	43.5	69.78	69.97	62.18	48.62	61.66	69.05	56.74	66.94	60	54.1	60.8	60.88	57.17	63.6
CgFIP37	12.72	14.11	14.15	14.15	8.62	10.06	7.17	13.32	11.73	9.77	11.84	11.2	10.5	16.16	11.75	9.4	9.08	9.89	11.56	9.39	8.71	8.09	9.31	10.22
CgECT5	32.17	26.49	21.82	21.82	16.57	19.79	12.73	15.83	16.52	14.25	17.47	17.25	15.09	23.46	30.98	30.72	15.7	17.84	17.77	15.11	14.8	16.29	12.82	13.64
CgALKBH6	4.13	5	4.84	4.84	9.78	6.2	5.79	8.39	7.71	5.77	8.91	9.47	9.23	5.04	5.22	5.13	9.28	9.18	6.75	6.32	6.68	7.19	10.15	8.91
CgECT6	11.54	10.76	10.97	10.97	11.23	11.1	6.68	25.26	24.05	17.04	24.58	18.78	21.24	11.67	10.92	12.55	11.46	10.55	11.63	16.93	14.87	14.92	15.31	21.04
CgALKBH7	0.97	0.6	0.91	0.91	3.58	2.95	2.63	5.42	4.3	7.89	4.04	9.81	8.66	1.66	1.57	2.47	11.61	5.52	7.36	10.49	8.29	5.89	24.03	17.07
CgALKBH8	5.04	5.01	6.62	6.62	5.78	5.43	6.15	9.79	9.12	10.17	8.36	7.72	7.99	4.21	5.23	6.55	8.61	8.55	9.67	10.05	10.7	10.61	8.85	9.75
CgHAKAI	28.18	30.58	29.38	29.38	27.3	26.53	28.18	32.17	26.15	24.45	27	23.82	25.99	34.16	28.42	26.27	27.87	31.16	30.72	25.01	23.49	22.24	22.59	25.36
CgALKBH9	1.63	2.34	2.46	2.46	2.84	2.62	1.87	2.32	2.69	2.3	3.2	2.9	3.57	3.18	3.72	3.18	3.96	3.43	3.91	3.54	3.28	2.78	4.35	3.98
CgVIR	11.54	12.31	11.62	11.62	12.68	11.59	9.46	15.07	11.93	11.26	14.77	15.21	14.27	14.34	12.54	11.43	14.19	12.98	13.5	12.47	10.88	9.34	12.05	12.95
CgECT7	14.9	16.71	20.42	20.42	14.28	12.96	13.23	8.8	9.92	11.21	14.13	15.45	13.69	22.81	22.44	24.23	11.37	17.93	20.27	11.92	13.28	13.78	13.55	12.85
CgALKBH10	3.67	2.93	3.08	3.08	1.94	2.79	1.14	8.77	5.76	6.34	6.32	6.3	6.67	5.98	5.84	5.11	4.09	4.32	5.62	5.84	6.41	6.13	7.09	7.24
CgECT8	36.35	39.41	23.82	23.82	66.76	63.36	62.42	57.55	49.72	45.65	42.08	37.1	41.08	41.45	47.36	39.08	57.48	51	43.22	55.99	50.87	50.3	49.26	49.35
CgECT9	39.83	41.4	29.74	29.74	33.04	30.71	23.01	28.94	21.49	18.06	22.69	23.38	24.71	40.32	34.41	24.16	27	23.76	23.2	20.15	16.01	16.76	25.28	24.69
CgMTB	18.16	17.98	17.82	17.82	24.59	28.04	23.47	24.74	22.88	20.67	23.56	22.77	21.75	18.6	14.96	17.23	19.82	23.99	21.67	20.31	21.35	20.02	19.4	20.45
CgECT10	8.57	7.15	12.45	12.45	18.57	20.41	17.05	11.31	8.15	7.88	9.39	9.57	9.34	12.72	13.14	16.47	19.19	17.79	19.37	10.24	9.07	10.2	10.37	11.81
